# Supplementary material for: The anti-sigma factor MucA is required for viability in Pseudomonas aeruginosa
Source: PubMed Central journal article supplement — Mol Microbiol. Author manuscript; Available in PMC 2023 Apr 3. (PMC10069406; doi:10.1111/mmi.14732), 2021-05-18
Supplement: NIHMS1880720-supplement-Supplemental.pdf [file NIHMS1880720-supplement-Supplemental.pdf]

## SUPPLEMENTARY INFORMATION

The anti-sigma factor MucA is required for viability in *Pseudomonas aeruginosa*

Melissa C. Schofield, Daniela Rodriguez, Amanda A. Kidman, Erin K Cassin, Lia A. Michaels,  
Elizabeth A. Campbell, Peter A. Jorth and Boo Shan Tseng

Supplementary Methods

Supplementary Tables S1-S7

Supplementary Figures S1-S6

Supplementary References

## SUPPLEMENTARY METHODS

**Media, antibiotics, and antibodies.** Bacteria were grown in liquid LB (10 g/L tryptone, 5 g/L yeast extract, 10 g/L NaCl) and LSLB (10 g/L tryptone, 5 g/L yeast extract, 5 g/L NaCl). Semi-solid media was prepared by adding 1.5% Bacto agar to LB or 1.0% Noble agar to VBMM (Vogel & Bonner, 1956). *Pseudomonas* isolation agar (PIA; Hardy Diagnostics), *Pseudomonas* isolation broth (PIB; US Biological), and synthetic cystic fibrosis medium (SCFM, prepared as previously described (Palmer *et al.*, 2007)) were also used. For experiments involving induction of the *araC*-*P<sub>araBAD</sub>* promoter, L-arabinose was used at the indicated concentrations; the *rhaSR*-*P<sub>rhaBAD</sub>* promoter, L-rhamnose at 0.05%. Antibiotics were used at the following concentrations: for *E. coli*, 10 mg/L gentamicin, 50 mg/L kanamycin, 50 mg/L carbenicillin, 100 mg/L ampicillin, 10 mg/L tetracycline; for *P. aeruginosa*, 60 mg/L gentamicin for chromosomally integrated strains, 50 mg/L gentamicin for plasmid-borne strains, 300 mg/L carbenicillin, and 100 mg/L tetracycline. Antibodies against RpoD (ThermoFisher) were used at 1/1000 and RNAP (ThermoFisher) at 1/10,000.

**Calculation of growth rate.** Bacteria were grown overnight on LB plates (unless otherwise indicated) at 37°C. Single colonies were taken from plates to cultures in appropriate liquid media, and grown with shaking at 250rpm at 37°C until stationary phase. These cultures were then used to seed the cells into a 96 well plate using the indicated medium at OD<sub>600</sub> of 0.001. Using a Synergy Hybrid HTX Microplate Reader (Bio-Tek Instruments), the OD<sub>600</sub> was measured every 5 min for 16 h at 37°C with shaking. To calculate growth rates, the slope of exponential growth phase of the growth curve was determined. For normalized growth rates, the rates were normalized to the positive control of the respective experiment.

**Construction of strains.** Sequenced strains of *P. aeruginosa* were obtained from the *Pseudomonas* Genome Database ([www.pseudomonas.com](http://www.pseudomonas.com)) (Winsor *et al.*, 2016). Bacterial genomic DNA was isolated using the DNeasy Blood & Tissue Kit (Qiagen), and PCR fragments were purified using the Wizard SV Gel and PCR Clean-up System (Promega). To delete genes, allelic exchange was used with the corresponding plasmid containing the deletion allele, as previously described (Hmelo *et al.*, 2015). For miniTn7 and miniCTX, the alleles were chromosomally integrated, as previously described (Choi & Schweizer, 2006, Hoang *et al.*, 2000).

To construct deletion alleles, the regions flanking the gene of interest were produced by PCR of PAO1 gDNA using the respective UpF/UpR and DownF/DownR primer pairs. These fragments were then connected by SOE PCR and inserted into pDONRPEX18Gm using GateWay cloning (Invitrogen) to produce deletion vectors, which were confirmed via Sanger sequencing.

The miniTn7-based plasmid containing the full-length *mucA* allele under its native promoter (pBT399) was constructed via PCR of PAO1 gDNA using OBT603/604B and OBT605B/606B. These fragments were then connected by SOE PCR and inserted into pDONRUC18T-miniTn7T2-Gm using GateWay cloning. To create the *mucA* truncation series, QuikChange site directed mutagenesis (Agilent Technologies) of pBT399 was used to engineer plasmids with alleles of the desired *mucA* length (pBT406, pBT407, pBT408, pBT410, pBT413, pBT414, pMS009, pMS023, pMS024). To construct *mucA* single amino acid substitutions, the same methods were used with pBT408.

A miniTn7-based plasmid containing the full-length *algU* allele under its native promoter (pAAK014) was constructed via PCR of PAO1 gDNA using OAK12/OAK2. To construct *algU* single amino acid substitutions, PCR of PAO1 gDNA using OAK12 with the respective UpR

primer (OAK20, OAK22, OAK26, or OAK29) and OAK2 with the respective DownR primer (OAK21, OAK23, OAK27, or OAK30) were performed. These fragments were then connected by SOE PCR and inserted into pDONRPUC18T-miniTn7T2-Gm using GateWay cloning.

To construct the strains used in the yeast two-hybrid assays, the open reading frame (ORF) of *algU*, a shortened allele of *mucA* (encoding the first 75 residues), and mutations of *mucA* (*mucA* 1-75 encoding the D15A, E22A, or R42A substitutions) were amplified by PCR and recombined into pDONR221 P1-P2 using BP clonase (Invitrogen). These plasmids were then recombined with the pEXP22 or pEXP32 vectors, resulting in either the Gal4 activation domain-based prey vectors (pAAK001, pAAK003) or the DNA binding domain-based bait vectors (pAAK002, pAAK004, pAAK033, pAAK034, pAAK042). Plasmids were transformed into *Saccharomyces cerevisiae* MaV203 using the S.c. Easy Comp Transformation Kit (ThermoFisher).

A miniTn7-based plasmid with *mucA* under the control of a rhamnose-inducible promoter (pLM7) was constructed via PCR of pBT399 with OLM24/25, followed by restriction digest with HindIII and Apal (New England Biolabs) and ligation of this PCR product into pJM220.

A miniTn7-based plasmid with *algU* under the control of an arabinose-inducible promoter was made by first inserting *algU* into a GateWay compatible vector using the PCR product of OCT1/2 with PAO1 gDNA. An LR reaction with this vector, pJJH187, and pUC18-miniTn7T2-Gm-GW was performed, resulting in a pDEST construct (pCT2). The *algU* single amino acid substitution at K57A under the control of an arabinose-inducible promoter was constructed via QuikChange on the pCT2 plasmid using OAK22/OAK23 (pMS050).

A miniCTX-based plasmid with *rpoD* under the control of an arabinose-inducible promoter was first made by inserting *rpoD* into a GateWay compatible vector using the PCR product of OMS182/216 with PAO1 gDNA. An LR reaction with this vector, pJJH187, and pDONRminiCTX2T2.1Gm-GW was performed, resulting in pDEST construct (pMS037).

To construct the *algD* reporter strains, a plasmid was constructed containing *gfpmut3* under the control of the *algD* promoter. The promoter is the same as that used by Damron and associates (Damron *et al.*, 2009). pBT435 was constructed via PCR of PAO1 gDNA using OBT846/847 and of pBT212 using OBT342/848. These fragments were then connected by SOE PCR and inserted into pDONR221 P1-P2 using GateWay cloning. An LR reaction was then performed to recombine this plasmid into pUCP22T2-GW, resulting in the final reporter (pBT435). For the vector control plasmid (pBT336), pBT212, pBT244, and pUCP22T2-GW were recombined using Gateway cloning. These plasmids were then transformed into the various strains via electroporation (Choi *et al.*, 2006).

**Analysis of whole genome sequencing.** *P. aeruginosa* genomes were sequenced using an Illumina NextSeq platform at the Microbial Genome Sequencing Center (Pittsburgh, PA). Sequencing reads were aligned to the appropriate reference genomes (Winsor *et al.*, 2016) for PAO1, PA103, and PAK using Breseq (Deatherage & Barrick, 2014). Mutations detected in  $\Delta$ *mucA* strains were compared to their respective wild-type parent strains to identify suppressor mutations.

**Construction of AlgU-holoenzyme model.** The model of AlgU-holoenzyme with promoter DNA was made by superimposing  $\sigma^E$  Region 2 and  $\sigma^E$  Region 4 from the crystal structure of the *E. coli*  $\sigma^E$  with the anti- $\sigma$  factor RseA (PDB 1OR7)(Campbell *et al.*, 2003) onto the respective domains of  $\sigma^{70}$  from an *E. coli*  $\sigma^{70}$ -holoenzyme crystal structure (PDB 4LJZ)(Bae *et al.*, 2013).

The promoter DNA is a hybrid of DNAs taken from superimpositions of structures of *E. coli*  $\sigma^E$  Region 2 bound to its -10 element (PDB 4LUP)(Campagne *et al.*, 2014) and  $\sigma^E$  Region 4 bound to the -35 element (PDB 2H27)(Lane & Darst, 2006). The remaining promoter region was modeled from the *M. tuberculosis* RNAP/open complex structure (PDB 6EDT)(Boyaci *et al.*, 2019).

**Semi-quantitative Western blots.** Western blot quantification was performed using AzureSpot software (Azure BioSystems). All signals were background subtracted. The RpoD signal was then normalized to that of RNAP for the same sample. To determine the relative level, this normalized signal was divided by that of the parental strain within the same replicate.

**Table S1. Eliminating alginate biosynthesis does not alleviate *mucA* essentiality.**

| PAO1                                  | Number of isolates resolved to |               |
|---------------------------------------|--------------------------------|---------------|
|                                       | WT                             | $\Delta mucA$ |
| WT                                    | 168                            | 0*            |
| $\Delta algD$                         | 144                            | 0*            |
| $\Delta algB$                         | 158                            | 0*            |
| $\Delta algR$                         | 153                            | 0*            |
| $\Delta amrZ$                         | 131                            | 0*            |
| $\Delta algB \Delta algR \Delta amrZ$ | 133                            | 0*            |

\*  $p < 0.0001$ , Fischer's exact test

**Table S2. Description of changes found in *algU* of PAO1  $\Delta mucA$  *attTn7::P<sub>rhaBAD</sub>-mucA* revertants that can grow in the absence of *mucA* expression.**

|                            | Isolate | Genomic Change to <i>algU</i> <sup>†</sup> | Effect on AlgU <sup>‡</sup> |
|----------------------------|---------|--------------------------------------------|-----------------------------|
| Multi-base pair deletions  |         |                                            |                             |
|                            | #1-10   | 831242-831394 del                          | No product made             |
|                            | #2-9    | 831298-831491 del                          | No product made             |
|                            | #2-7    | 831467-831473 del                          | I56fs X97                   |
|                            | #2-11   | 831469-831502 del                          | K57fs X88                   |
|                            | #2-6    | 831595-831715 del                          | V99fs X107                  |
| Single base pair deletions |         |                                            |                             |
|                            | #2-14   | 831467 del                                 | I56fs X99                   |
|                            | #1-1    | 831510 del                                 | Y72fs X99                   |
|                            | #2-10   | 831538 del                                 | I80fs X99                   |
| Nonsense mutations         |         |                                            |                             |
|                            | #2-1    | 831433 C>T                                 | Q45X                        |
|                            | #2-8    | 831521 G>A                                 | W74X                        |
| Multi-base pair insertions |         |                                            |                             |
|                            | #1-9    | 831427-831435 ins GACGCCAG                 | D43-A44 ins DAQ             |
|                            | #1-8    | 831430-831438 ins GCCCAGGAA                | A44-Q45 ins AQE             |
|                            | #1-11   | 831436-831444 ins GAAGCCCAG                | E46-A47 ins EAQ             |
|                            | #2-4    | 831436-831444 ins GAAGCCCAG                | E46-A47 ins EAQ             |
|                            | #1-5    | 831445-831456 ins GACGTAGCCCAG             | D49-V50 ins DVAQ            |
|                            | #1-6    | 831451-831459 ins GCCCAGGAA                | A51-Q52 ins AQE             |
| Missense mutations         |         |                                            |                             |
|                            | #1-3    | 831353 A>G                                 | D18G                        |
|                            | #2-12   | 831362 C>T                                 | A21V                        |
|                            | #2-3    | 831386 A>G                                 | Y29C                        |
|                            | #2-2    | 831439 G>A                                 | A47T                        |
|                            | #1-2    | 831446 A>G                                 | D49G                        |
|                            | #2-13   | 831446 A>G                                 | D49G                        |
|                            | #1-7    | 831476 A>G                                 | Y59C                        |
|                            | #2-5    | 831541 A>G                                 | N81D                        |
|                            | #1-4    | 831820 C>G                                 | R174G                       |

<sup>†</sup> genomic location based on the *Pseudomonas* Genome Database (Winsor *et al.*, 2016) for PAO1; bp, base pair; del, deletion; ins, insertion.

<sup>‡</sup> fs, frameshift; ins, insertion; X, stop codon.

**Table S3. Statistical differences in growth rate among groups under conditions of *algU* induction.**

| Medium: LB                                                       |      | <i>attTn7::P<sub>araBAD</sub>-algU</i> |     |      |   | $\Delta algU$ <i>attTn7::P<sub>araBAD</sub>-algU</i> |     |      |   | $\Delta algU \Delta mucA$ <i>attTn7::P<sub>araBAD</sub>-algU</i> |     |      |   |
|------------------------------------------------------------------|------|----------------------------------------|-----|------|---|------------------------------------------------------|-----|------|---|------------------------------------------------------------------|-----|------|---|
| Strain                                                           | Ara  | 0                                      | 0.1 | 0.25 | 1 | 0                                                    | 0.1 | 0.25 | 1 | 0                                                                | 0.1 | 0.25 | 1 |
| <i>attTn7::P<sub>araBAD</sub>-algU</i>                           | 0    |                                        | *   | *    | * |                                                      |     |      |   |                                                                  |     |      |   |
|                                                                  | 0.1  |                                        |     |      | * |                                                      |     |      |   |                                                                  |     |      |   |
|                                                                  | 0.25 |                                        |     |      |   |                                                      |     |      |   |                                                                  | *   |      |   |
|                                                                  | 1    |                                        |     |      |   |                                                      |     |      | * |                                                                  |     |      | * |
| $\Delta algU$ <i>attTn7::P<sub>araBAD</sub>-algU</i>             | 0    |                                        |     |      |   |                                                      |     | *    | * |                                                                  |     |      |   |
|                                                                  | 0.1  |                                        |     |      |   |                                                      |     | *    | * |                                                                  | *   |      |   |
|                                                                  | 0.25 |                                        |     |      |   |                                                      |     |      | * |                                                                  | *   |      |   |
|                                                                  | 1    |                                        |     |      |   |                                                      |     |      |   |                                                                  |     |      |   |
| $\Delta algU \Delta mucA$ <i>attTn7::P<sub>araBAD</sub>-algU</i> | 0    |                                        |     |      |   |                                                      |     |      |   | *                                                                | *   | *    |   |
|                                                                  | 0.1  |                                        |     |      |   |                                                      |     |      |   |                                                                  | *   | *    |   |
|                                                                  | 0.25 |                                        |     |      |   |                                                      |     |      |   |                                                                  |     |      |   |
|                                                                  | 1    |                                        |     |      |   |                                                      |     |      |   |                                                                  |     |      |   |

  

| Medium: PIB                                                      |     | <i>attTn7::P<sub>araBAD</sub>-algU</i> |   | $\Delta algU$ <i>attTn7::P<sub>araBAD</sub>-algU</i> |   | $\Delta algU \Delta mucA$ <i>attTn7::P<sub>araBAD</sub>-algU</i> |   |
|------------------------------------------------------------------|-----|----------------------------------------|---|------------------------------------------------------|---|------------------------------------------------------------------|---|
| Strain                                                           | Ara | 0                                      | 1 | 0                                                    | 1 | 0                                                                | 1 |
| <i>attTn7::P<sub>araBAD</sub>-algU</i>                           | 0   |                                        | * |                                                      |   |                                                                  |   |
|                                                                  | 1   |                                        |   |                                                      |   |                                                                  |   |
| $\Delta algU$ <i>attTn7::P<sub>araBAD</sub>-algU</i>             | 0   |                                        |   |                                                      | * |                                                                  |   |
|                                                                  | 1   |                                        |   |                                                      |   |                                                                  |   |
| $\Delta algU \Delta mucA$ <i>attTn7::P<sub>araBAD</sub>-algU</i> | 0   |                                        |   |                                                      |   |                                                                  | * |
|                                                                  | 1   |                                        |   |                                                      |   |                                                                  |   |

  

| Medium: SCFM                                                     |     | <i>attTn7::P<sub>araBAD</sub>-algU</i> |   | $\Delta algU$ <i>attTn7::P<sub>araBAD</sub>-algU</i> |   | $\Delta algU \Delta mucA$ <i>attTn7::P<sub>araBAD</sub>-algU</i> |   |
|------------------------------------------------------------------|-----|----------------------------------------|---|------------------------------------------------------|---|------------------------------------------------------------------|---|
| Strain                                                           | Ara | 0                                      | 1 | 0                                                    | 1 | 0                                                                | 1 |
| <i>attTn7::P<sub>araBAD</sub>-algU</i>                           | 0   |                                        | * |                                                      |   |                                                                  |   |
|                                                                  | 1   |                                        |   |                                                      |   |                                                                  |   |
| $\Delta algU$ <i>attTn7::P<sub>araBAD</sub>-algU</i>             | 0   |                                        |   |                                                      | * |                                                                  |   |
|                                                                  | 1   |                                        |   |                                                      |   |                                                                  |   |
| $\Delta algU \Delta mucA$ <i>attTn7::P<sub>araBAD</sub>-algU</i> | 0   |                                        |   |                                                      |   |                                                                  | * |
|                                                                  | 1   |                                        |   |                                                      |   |                                                                  |   |

  

| Medium: VBMM                                                     |     | <i>attTn7::P<sub>araBAD</sub>-algU</i> |   | $\Delta algU$ <i>attTn7::P<sub>araBAD</sub>-algU</i> |   | $\Delta algU \Delta mucA$ <i>attTn7::P<sub>araBAD</sub>-algU</i> |   |
|------------------------------------------------------------------|-----|----------------------------------------|---|------------------------------------------------------|---|------------------------------------------------------------------|---|
| Strain                                                           | Ara | 0                                      | 1 | 0                                                    | 1 | 0                                                                | 1 |
| <i>attTn7::P<sub>araBAD</sub>-algU</i>                           | 0   |                                        | * |                                                      |   | *                                                                |   |
|                                                                  | 1   |                                        |   |                                                      |   |                                                                  | * |
| $\Delta algU$ <i>attTn7::P<sub>araBAD</sub>-algU</i>             | 0   |                                        |   |                                                      | * |                                                                  |   |
|                                                                  | 1   |                                        |   |                                                      |   |                                                                  | * |
| $\Delta algU \Delta mucA$ <i>attTn7::P<sub>araBAD</sub>-algU</i> | 0   |                                        |   |                                                      |   |                                                                  | * |
|                                                                  | 1   |                                        |   |                                                      |   |                                                                  |   |

Significance was determined via a two-way ANOVA with post-hoc Bonferroni. Ara, concentration of arabinose (%). Asterisk,  $p < 0.05$ . Open box, no statistical difference.

**Table S4. Statistical differences in growth rate among groups overexpressing *algU* and/or *rpoD*.**

| Strain                                                              | Strain | $\Delta algU\Delta mucA$<br>$P_{BAD-rpoD}$ |   | $\Delta algU\Delta mucA$<br>$P_{BAD-algU^{WT}}$ |   | $\Delta algU\Delta mucA$<br>$P_{BAD-algU^{WT}}$<br>$P_{BAD-rpoD}$ |   | $\Delta algU\Delta mucA$<br>$P_{BAD-algU^{K57A}}$ |   | $\Delta algU\Delta mucA$<br>$P_{BAD-algU^{K57A}}$<br>$P_{BAD-rpoD}$ |   |
|---------------------------------------------------------------------|--------|--------------------------------------------|---|-------------------------------------------------|---|-------------------------------------------------------------------|---|---------------------------------------------------|---|---------------------------------------------------------------------|---|
|                                                                     |        | 0                                          | 2 | 0                                               | 2 | 0                                                                 | 2 | 0                                                 | 2 | 0                                                                   | 2 |
| $\Delta algU\Delta mucA$                                            | 0      |                                            |   |                                                 |   |                                                                   |   |                                                   |   |                                                                     |   |
|                                                                     | 2      |                                            |   |                                                 | * |                                                                   |   |                                                   | * |                                                                     |   |
| $\Delta algU\Delta mucA$<br>$P_{BAD-rpoD}$                          | 0      |                                            |   |                                                 |   |                                                                   |   |                                                   |   |                                                                     |   |
|                                                                     | 2      |                                            |   |                                                 | * |                                                                   |   |                                                   | * |                                                                     |   |
| $\Delta algU\Delta mucA$<br>$P_{BAD-algU^{WT}}$                     | 0      |                                            |   |                                                 | * |                                                                   |   |                                                   |   |                                                                     |   |
|                                                                     | 2      |                                            |   |                                                 |   |                                                                   | * |                                                   | * |                                                                     | * |
| $\Delta algU\Delta mucA$<br>$P_{BAD-algU^{WT}}$<br>$P_{BAD-rpoD}$   | 0      |                                            |   |                                                 |   |                                                                   | * |                                                   |   |                                                                     |   |
|                                                                     | 2      |                                            |   |                                                 |   |                                                                   |   |                                                   |   |                                                                     |   |
| $\Delta algU\Delta mucA$<br>$P_{BAD-algU^{K57A}}$                   | 0      |                                            |   |                                                 |   |                                                                   |   |                                                   | * |                                                                     |   |
|                                                                     | 2      |                                            |   |                                                 |   |                                                                   |   |                                                   |   |                                                                     |   |
| $\Delta algU\Delta mucA$<br>$P_{BAD-algU^{K57A}}$<br>$P_{BAD-rpoD}$ | 0      |                                            |   |                                                 |   |                                                                   |   |                                                   |   |                                                                     | * |
|                                                                     | 2      |                                            |   |                                                 |   |                                                                   |   |                                                   |   |                                                                     |   |

Significance was determined via a two-way ANOVA with post-hoc Bonferroni. Ara, concentration of arabinose (%). Asterisk,  $p < 0.05$ . Open box, no statistical difference.



**Table S5. Bacterial strains used in this study.**

| Strains                              | Relevant characteristics                                                                                                                                                                                                                                   | Source                            |
|--------------------------------------|------------------------------------------------------------------------------------------------------------------------------------------------------------------------------------------------------------------------------------------------------------|-----------------------------------|
| <b><i>Escherichia coli</i></b>       |                                                                                                                                                                                                                                                            |                                   |
| NEB5 $\alpha$                        | For cloning; <i>fhuA2</i> $\Delta$ ( <i>argF-lacZ</i> ) <i>U169 phoA glnV44</i> $\Phi$ 80 $\Delta$ ( <i>lacZ</i> ) <i>M15 gyrA96 recA1 relA1 endA1 thi-1 hsdR17</i>                                                                                        | NEB                               |
| ccdB Survival2 T1R                   | F <sup>-</sup> <i>mcrA</i> $\Delta$ ( <i>mrr-hsdRMS-mcrBC</i> ) $\Phi$ 80 <i>lacZ</i> $\Delta$ <i>M15</i> $\Delta$ <i>lacX74 recA1 ara</i> $\Delta$ <i>139</i> $\Delta$ ( <i>ara-leu</i> ) <i>7697 galU galK rpsL endA1 nupG fhuA::IS2, Sm<sup>r</sup></i> | Invitrogen                        |
| S17.1 ( $\lambda_{pir}$ )            | For conjugation; F <sup>-</sup> RP4-2-Tc::Mu <i>aphA::Tn7 recA</i> $\lambda_{pir}$ lysogen, Sm <sup>r</sup> , Tc <sup>r</sup>                                                                                                                              | (Kristensen <i>et al.</i> , 1995) |
| <b><i>Pseudomonas aeruginosa</i></b> |                                                                                                                                                                                                                                                            |                                   |
| PAO1                                 | Wild-type PAO1                                                                                                                                                                                                                                             | (Holloway, 1955)                  |
| PAO1 $\Delta$ <i>mucA</i>            | PAO1 containing an unmarked deletion of <i>mucA</i>                                                                                                                                                                                                        | (Pritchett <i>et al.</i> , 2015)  |
| PA103                                | Wild-type PA103                                                                                                                                                                                                                                            | (Frank <i>et al.</i> , 1994)      |
| PA103 $\Delta$ <i>mucA</i>           | PA103 containing nonpolar deletion of <i>mucA</i>                                                                                                                                                                                                          | (Intile <i>et al.</i> , 2014)     |
| PAK                                  | Wild-type PAK                                                                                                                                                                                                                                              | (Takeya & Amako, 1966)            |
| PAK                                  | <i>attCTX::lacP1</i> $\Delta$ <i>lac1-lac2</i>                                                                                                                                                                                                             | (Fulcher <i>et al.</i> , 2010)    |
| PAK $\Delta$ <i>mucA</i>             | $\Delta$ <i>mucA attCTX::lacP1</i> $\Delta$ <i>lac1-lac2</i>                                                                                                                                                                                               | (Jones <i>et al.</i> , 2010)      |
| PA14                                 | Wild-type PA14                                                                                                                                                                                                                                             | (Rahme <i>et al.</i> , 1995)      |
| CF127                                | Mucoid CF isolate                                                                                                                                                                                                                                          | (Wolfgang <i>et al.</i> , 2003)   |
| CF18                                 | Non-mucoid CF isolate                                                                                                                                                                                                                                      | (Wolfgang <i>et al.</i> , 2003)   |
| CF27                                 | Rugose CF isolate                                                                                                                                                                                                                                          | (Wolfgang <i>et al.</i> , 2003)   |
| X13273                               | Blood isolate                                                                                                                                                                                                                                              | (Wolfgang <i>et al.</i> , 2003)   |
| X24509                               | UTI isolate                                                                                                                                                                                                                                                | (Wolfgang <i>et al.</i> , 2003)   |
| MSH10                                | Water isolate                                                                                                                                                                                                                                              | (Wolfgang <i>et al.</i> , 2003)   |
| E2                                   | Tomato plant isolate                                                                                                                                                                                                                                       | (Wolfgang <i>et al.</i> , 2003)   |
| BTPa156                              | PAO1 containing an in-frame deletion of <i>algD</i>                                                                                                                                                                                                        | (Tseng <i>et al.</i> , 2013)      |
| BTPa669                              | PAO1 containing an in-frame deletion of <i>algB</i>                                                                                                                                                                                                        | This study                        |
| BTPa671                              | PAO1 containing an in-frame deletion of <i>amrZ</i>                                                                                                                                                                                                        | This study                        |
| BTPa675                              | PAO1 containing an in-frame deletion of <i>algR</i>                                                                                                                                                                                                        | This study                        |
| BTPa685                              | PAO1 containing an in-frame deletions of <i>algB</i> , <i>amrZ</i> , and <i>algR</i>                                                                                                                                                                       | This study                        |
| BTPa391                              | PAO1 $\Delta$ <i>algU</i> $\Delta$ <i>mucA</i>                                                                                                                                                                                                             | This study                        |
| BTPa355                              | PAO1 $\Delta$ <i>mucA attTn7::P<sub>algU</sub>-mucA(1-194)</i> -10His                                                                                                                                                                                      | This study                        |
| BTPa628                              | PAO1 $\Delta$ <i>algD attTn7::P<sub>algU</sub>-mucA(1-194)</i> -10His                                                                                                                                                                                      | This study                        |
| BTPa715                              | PAO1 $\Delta$ <i>algD attTn7::P<sub>algU</sub>-mucA(1-143)</i> -10His                                                                                                                                                                                      | This study                        |
| BTPa620                              | PAO1 $\Delta$ <i>algD attTn7::P<sub>algU</sub>-mucA(1-110)</i> -10His                                                                                                                                                                                      | This study                        |
| BTPa622                              | PAO1 $\Delta$ <i>algD attTn7::P<sub>algU</sub>-mucA(1-75)</i> -10His                                                                                                                                                                                       | This study                        |

|         |                                                                                                                |            |
|---------|----------------------------------------------------------------------------------------------------------------|------------|
| BTPa601 | PAO1 $\Delta algD$ attTn7::P <sub>algU</sub> -mucA(1-62)-10His                                                 | This study |
| BTPa603 | PAO1 $\Delta algD$ attTn7::P <sub>algU</sub> -mucA(1-50)-10His                                                 | This study |
| BTPa605 | PAO1 $\Delta algD$ attTn7::P <sub>algU</sub> -mucA(1-40)-10His                                                 | This study |
| BTPa606 | PAO1 $\Delta algD$ attTn7::P <sub>algU</sub> -mucA(1-24)-10His                                                 | This study |
| BTPa673 | PAO1 $\Delta algD$ attTn7::P <sub>algU</sub> -mucA(51-194)-10His                                               | This study |
| BTPa832 | PAO1 $\Delta algD$ attTn7::P <sub>algU</sub> -mucA(1-75) D15A-10His                                            | This study |
| BTPa844 | PAO1 $\Delta algD$ attTn7::P <sub>algU</sub> -mucA(1-75) E22A-10His                                            | This study |
| BTPa835 | PAO1 $\Delta algD$ attTn7::P <sub>algU</sub> -mucA(1-75) R42A-10His                                            | This study |
| BTPa643 | PAO1 $\Delta mucA$ $\Delta algD$ attTn7::P <sub>algU</sub> -mucA(1-194)-10His                                  | This study |
| BTPa635 | PAO1 $\Delta mucA$ $\Delta algD$ attTn7::P <sub>algU</sub> -mucA(1-110)-10His                                  | This study |
| BTPa762 | PAO1 $\Delta mucA$ $\Delta algD$ attTn7::P <sub>algU</sub> -mucA(1-143)-10His                                  | This study |
| BTPa637 | PAO1 $\Delta mucA$ $\Delta algD$ attTn7::P <sub>algU</sub> -mucA(1-75)-10His                                   | This study |
| BTPa639 | PAO1 $\Delta mucA$ $\Delta algD$ attTn7::P <sub>algU</sub> -mucA(1-62)-10His                                   | This study |
| BTPa641 | PAO1 $\Delta mucA$ $\Delta algD$ attTn7::P <sub>algU</sub> -mucA(1-50)-10His                                   | This study |
| BTPa548 | PAO1 $\Delta mucA$ $\Delta algD$ attTn7::P <sub>algU</sub> -mucA(1-75) E22A-10His                              | This study |
| BTPa812 | PAO1 attTn7::P <sub>algU</sub> -mucA(1-155)-10His                                                              | This study |
| BTPa816 | PAO1 $\Delta mucA$ attTn7::P <sub>algU</sub> -mucA(1-155)-10His                                                | This study |
| BTPa382 | PAO1 $\Delta algU$                                                                                             | This study |
| BTPa740 | PAO1 $\Delta algU$ attTn7::P <sub>algU</sub> -algU                                                             | This study |
| BTPa748 | PAO1 $\Delta algU$ attTn7::P <sub>algU</sub> -algU K57A                                                        | This study |
| BTPa754 | PAO1 $\Delta algU$ attTn7::P <sub>algU</sub> -algU N81A                                                        | This study |
| BTPa846 | PAO1 $\Delta algU$ attTn7::P <sub>algU</sub> -algU E46G                                                        | This study |
| BTPa757 | PAO1 $\Delta algU$ attTn7::P <sub>algU</sub> -algU A58T                                                        | This study |
| BTPa763 | PAO1 $\Delta algU$ $\Delta mucA$ attTn7::P <sub>algU</sub> -algU K57A                                          | This study |
| BTPa764 | PAO1 $\Delta algU$ $\Delta mucA$ attTn7::P <sub>algU</sub> -algU N81A                                          | This study |
| BTPa849 | PAO1 $\Delta algU$ $\Delta mucA$ attTn7::P <sub>algU</sub> -algU E46G                                          | This study |
| BTPa837 | PAO1 $\Delta algU$ $\Delta mucA$ attTn7::P <sub>algU</sub> -algU A58T                                          | This study |
| BTPa616 | PAO1 attTn7::rhaSR-P <sub>rhaBAD</sub> -mucA-10His                                                             | This study |
| BTPa624 | PAO1 $\Delta mucA$ attTn7::rhaSR-P <sub>rhaBAD</sub> -mucA-10His                                               | This study |
| BTPa646 | PAO1 attTn7::P <sub>araBAD</sub> -algU-10His::Gm                                                               | This study |
| BTPa527 | PAO1 $\Delta algU$ attTn7::P <sub>araBAD</sub> -algU::Gm                                                       | This study |
| BTPa529 | PAO1 $\Delta algU$ $\Delta mucA$ attTn7::P <sub>araBAD</sub> -algU::Gm                                         | This study |
| BTPa853 | PAO1 $\Delta algU$ $\Delta mucA$ attCTX2::P <sub>araBAD</sub> -rpoD                                            | This study |
| BTPa855 | PAO1 $\Delta algU$ $\Delta mucA$ attCTX2::P <sub>araBAD</sub> -rpoD attTn7::P <sub>BADara</sub> -algU::Gm      | This study |
| BTPa859 | PAO1 $\Delta algU$ $\Delta mucA$ attTn7::P <sub>araBAD</sub> -algU K57A::Gm                                    | This study |
| BTPa861 | PAO1 $\Delta algU$ $\Delta mucA$ attCTX2::P <sub>araBAD</sub> -rpoD attTn7::P <sub>BADara</sub> -algU K57A::Gm | This study |
| BTPa149 | PAO1 pBT336 (vector control)                                                                                   | This study |
| BTPa550 | PAO1 pBT435                                                                                                    | This study |
| BTPa559 | PAO1 $\Delta algU$ pBT435                                                                                      | This study |
| BTPa552 | PAO1 $\Delta algU$ attTn7::P <sub>algU</sub> -algU pBT435                                                      | This study |
| BTPa553 | PAO1 $\Delta algU$ attTn7::P <sub>algU</sub> -algU K57A pBT435                                                 | This study |
| BTPa554 | PAO1 $\Delta algU$ attTn7::P <sub>algU</sub> -algU N81A pBT435                                                 | This study |
| BTPa555 | PAO1 $\Delta algU$ attTn7::P <sub>algU</sub> -algU E46G pBT435                                                 | This study |
| BTPa556 | PAO1 $\Delta algU$ attTn7::P <sub>algU</sub> -algU A58T pBT435                                                 | This study |
| BTPa557 | PAO1 $\Delta mucA$ attTn7::rhaSR-P <sub>rhaBAD</sub> -mucA-10His pBT435                                        | This study |
| MSPa82  | PAO1 $\Delta mucA$ attTn7::rhaSR-P <sub>rhaBAD</sub> -mucA-10His revertant; #1-10                              | This study |
| MSPa83  | PAO1 $\Delta mucA$ attTn7::rhaSR-P <sub>rhaBAD</sub> -mucA-10His revertant; #1-2                               | This study |

|         |                                                                                          |            |
|---------|------------------------------------------------------------------------------------------|------------|
| MSPa84  | PAO1 $\Delta mucA$ attTn7:: <i>rhaSR-P<sub>rhaBAD</sub>-mucA</i> -10His revertant; #1-3  | This study |
| MSPa85  | PAO1 $\Delta mucA$ attTn7:: <i>rhaSR-P<sub>rhaBAD</sub>-mucA</i> -10His revertant; #1-4  | This study |
| MSPa86  | PAO1 $\Delta mucA$ attTn7:: <i>rhaSR-P<sub>rhaBAD</sub>-mucA</i> -10His revertant; #1-5  | This study |
| MSPa87  | PAO1 $\Delta mucA$ attTn7:: <i>rhaSR-P<sub>rhaBAD</sub>-mucA</i> -10His revertant; #1-6  | This study |
| MSPa88  | PAO1 $\Delta mucA$ attTn7:: <i>rhaSR-P<sub>rhaBAD</sub>-mucA</i> -10His revertant; #1-7  | This study |
| MSPa90  | PAO1 $\Delta mucA$ attTn7:: <i>rhaSR-P<sub>rhaBAD</sub>-mucA</i> -10His revertant; #1-8  | This study |
| MSPa91  | PAO1 $\Delta mucA$ attTn7:: <i>rhaSR-P<sub>rhaBAD</sub>-mucA</i> -10His revertant; #1-9  | This study |
| MSPa92  | PAO1 $\Delta mucA$ attTn7:: <i>rhaSR-P<sub>rhaBAD</sub>-mucA</i> -10His revertant; #1-10 | This study |
| MSPa93  | PAO1 $\Delta mucA$ attTn7:: <i>rhaSR-P<sub>rhaBAD</sub>-mucA</i> -10His revertant; #1-11 | This study |
| MSPa94  | PAO1 $\Delta mucA$ attTn7:: <i>rhaSR-P<sub>rhaBAD</sub>-mucA</i> -10His revertant; #2-1  | This study |
| MSPa95  | PAO1 $\Delta mucA$ attTn7:: <i>rhaSR-P<sub>rhaBAD</sub>-mucA</i> -10His revertant; #2-2  | This study |
| MSPa96  | PAO1 $\Delta mucA$ attTn7:: <i>rhaSR-P<sub>rhaBAD</sub>-mucA</i> -10His revertant; #2-3  | This study |
| MSPa98  | PAO1 $\Delta mucA$ attTn7:: <i>rhaSR-P<sub>rhaBAD</sub>-mucA</i> -10His revertant; #2-4  | This study |
| MSPa100 | PAO1 $\Delta mucA$ attTn7:: <i>rhaSR-P<sub>rhaBAD</sub>-mucA</i> -10His revertant; #2-5  | This study |
| MSPa101 | PAO1 $\Delta mucA$ attTn7:: <i>rhaSR-P<sub>rhaBAD</sub>-mucA</i> -10His revertant; #2-6  | This study |
| MSPa102 | PAO1 $\Delta mucA$ attTn7:: <i>rhaSR-P<sub>rhaBAD</sub>-mucA</i> -10His revertant; #2-7  | This study |
| MSPa103 | PAO1 $\Delta mucA$ attTn7:: <i>rhaSR-P<sub>rhaBAD</sub>-mucA</i> -10His revertant; #2-8  | This study |
| MSPa106 | PAO1 $\Delta mucA$ attTn7:: <i>rhaSR-P<sub>rhaBAD</sub>-mucA</i> -10His revertant; #2-9  | This study |
| MSPa107 | PAO1 $\Delta mucA$ attTn7:: <i>rhaSR-P<sub>rhaBAD</sub>-mucA</i> -10His revertant; #2-10 | This study |
| MSPa109 | PAO1 $\Delta mucA$ attTn7:: <i>rhaSR-P<sub>rhaBAD</sub>-mucA</i> -10His revertant; #2-11 | This study |
| MSPa111 | PAO1 $\Delta mucA$ attTn7:: <i>rhaSR-P<sub>rhaBAD</sub>-mucA</i> -10His revertant; #2-12 | This study |
| MSPa113 | PAO1 $\Delta mucA$ attTn7:: <i>rhaSR-P<sub>rhaBAD</sub>-mucA</i> -10His revertant; #2-13 | This study |
| MSPa114 | PAO1 $\Delta mucA$ attTn7:: <i>rhaSR-P<sub>rhaBAD</sub>-mucA</i> -10His revertant; #2-14 | This study |
| MSPa130 | MSPa82 pBT435                                                                            | This study |
| MSPa131 | MSPa83 pBT435                                                                            | This study |
| MSPa132 | MSPa84 pBT435                                                                            | This study |
| MSPa133 | MSPa85 pBT435                                                                            | This study |
| MSPa134 | MSPa86 pBT435                                                                            | This study |
| MSPa135 | MSPa87 pBT435                                                                            | This study |
| MSPa136 | MSPa88 pBT435                                                                            | This study |
| MSPa137 | MSPa90 pBT435                                                                            | This study |
| MSPa138 | MSPa91 pBT435                                                                            | This study |
| MSPa139 | MSPa92 pBT435                                                                            | This study |
| MSPa140 | MSPa93 pBT435                                                                            | This study |
| MSPa141 | MSPa94 pBT435                                                                            | This study |
| MSPa142 | MSPa95 pBT435                                                                            | This study |
| MSPa143 | MSPa96 pBT435                                                                            | This study |
| MSPa144 | MSPa98 pBT435                                                                            | This study |
| MSPa145 | MSPa100 pBT435                                                                           | This study |
| MSPa146 | MSPa101 pBT435                                                                           | This study |
| MSPa147 | MSPa102 pBT435                                                                           | This study |
| MSPa148 | MSPa103 pBT435                                                                           | This study |
| MSPa149 | MSPa106 pBT435                                                                           | This study |
| MSPa150 | MSPa107 pBT435                                                                           | This study |
| MSPa151 | MSPa109 pBT435                                                                           | This study |
| MSPa152 | MSPa111 pBT435                                                                           | This study |
| MSPa153 | MSPa113 pBT435                                                                           | This study |

|                                        |                                                                                                                                                                                                       |            |
|----------------------------------------|-------------------------------------------------------------------------------------------------------------------------------------------------------------------------------------------------------|------------|
| MSPa154                                | MSPa114 pBT435                                                                                                                                                                                        | This study |
| <b><i>Saccharomyces cerevisiae</i></b> |                                                                                                                                                                                                       |            |
| MaV203                                 | <i>MAT<math>\alpha</math>, leu2-3,112, trp1-901, his3<math>\Delta</math>200, ade2-101, gal4<math>\Delta</math>, gal80<math>\Delta</math>, SPAL10::URA3, GAL1::lacZ, HIS3::HIS3@LYS2, can1R, cyh2R</i> | Invitrogen |
| BTSc1-4                                | MaV203 containing pEXP32-Krev1 and pEXP22-RalGDS-WT                                                                                                                                                   | This study |
| BTSc9-12                               | MaV203 containing pEXP32-Krev1 and pEXP22-RalGDS-m2                                                                                                                                                   | This study |
| BTSc13-16                              | MaV203 containing pDEST32 and pDEST22                                                                                                                                                                 | This study |
| BTSc20,41-44                           | MaV203 containing pAAK004 and pAAK001                                                                                                                                                                 | This study |
| BTSc21-24                              | MaV203 containing pAAK002 and pAAK003                                                                                                                                                                 | This study |
| BTSc25-28                              | MaV203 containing pAAK002 and pDEST22                                                                                                                                                                 | This study |
| BTSc29-32                              | MaV203 containing pAAK004 and pDEST22                                                                                                                                                                 | This study |
| BTSc33-36                              | MaV203 containing pDEST32 and pAAK003                                                                                                                                                                 | This study |
| BTSc37-40                              | MaV203 containing pDEST32 and pAAK001                                                                                                                                                                 | This study |
| BTSc68-71                              | MaV203 containing pAAK033 and pAAK001                                                                                                                                                                 | This study |
| BTSc76-79                              | MaV203 containing pAAK034 and pAAK001                                                                                                                                                                 | This study |
| BTSc131-134                            | MaV203 containing pAAK042 and pAAK001                                                                                                                                                                 | This study |

**Table S6. Plasmids used in this study.**

| Plasmids                 | Relevant characteristics                                                                                                                                             | Source                            |
|--------------------------|----------------------------------------------------------------------------------------------------------------------------------------------------------------------|-----------------------------------|
| pDONR221 P5-P2           | GateWay-compatible vector with attP5 and attP2 recombination sites and <i>ccdB</i> ; Kn <sup>r</sup> , Cm <sup>r</sup>                                               | Invitrogen                        |
| pDONRPEX18Gm             | pEX18-based, GateWay-compatible suicide vector (Accession No. KM880128) with attP1 and attP2 recombination sites and <i>ccdB</i> ; Gm <sup>r</sup> , Cm <sup>r</sup> | (Hmelo <i>et al.</i> , 2015)      |
| pUC18-miniTn7T2-Gm-GW    | GateWay-compatible miniTn7 vector with attR1 and attR2 recombination sites and <i>ccdB</i> ; Ap <sup>r</sup> , Gm <sup>r</sup> , Cm <sup>r</sup>                     | (Zhao <i>et al.</i> , 2013)       |
| pDONRPUC18T-miniTn7T2-Gm | GateWay-compatible miniTn7 vector with attP1 and attP2 recombination sites and <i>ccdB</i> ; Ap <sup>r</sup> , Gm <sup>r</sup> , Cm <sup>r</sup>                     | (Tseng <i>et al.</i> , 2018)      |
| pDONR-miniCTX2T2.1       | GateWay-compatible miniCTX2 vector with attP1 and attP2 recombination sites and <i>ccdB</i> ; Tc <sup>r</sup>                                                        | Joe J. Harrison                   |
| pUCP22T2-GW              | GateWay-compatible pUCP22 vector with attR1 and attR2 recombination sites and <i>ccdB</i> ; Ap <sup>r</sup> , Gm <sup>r</sup> , Cm <sup>r</sup>                      | (Almblad <i>et al.</i> , 2015)    |
| pTNS2                    | T7 transposase expression vector; Ap <sup>r</sup>                                                                                                                    | (Choi & Schweizer, 2006)          |
| pFLP2                    | Plasmid that expresses Flp recombinase; Ap <sup>r</sup>                                                                                                              | (Choi & Schweizer, 2006)          |
| pJH187                   | pDONR221P1P5r-based Gateway-compatible vector encoding the <i>araC</i> repressor protein and the P <sub>araBAD</sub> promoter; Kn <sup>r</sup>                       | (Khakimova <i>et al.</i> , 2013)  |
| pJM220                   | pUC18T-miniTn7T based vector encoding <i>rhaSR</i> and the P <sub>rhaBAD</sub> promoter; Gm <sup>r</sup>                                                             | (Meisner & Goldberg, 2016)        |
| pBX39                    | pEX18Ap with an in-frame deletion of <i>amrZ</i> ; Ap <sup>r</sup>                                                                                                   | (Xu & Wozniak, 2015)              |
| pDEST22                  | Gal4 activation domain-based prey vector for Yeast Two-Hybrid system; Ap <sup>r</sup> , Cm <sup>r</sup>                                                              | Invitrogen                        |
| pDEST32                  | Gal4 DNA binding domain-based bait vector for Yeast Two-Hybrid system; Gm <sup>r</sup> , Cm <sup>r</sup>                                                             | Invitrogen                        |
| pDEST22-Krev1            | Two-hybrid control plasmid containing full-length rat Krev1; Ap <sup>r</sup>                                                                                         | Invitrogen                        |
| pDEST32-RalGDS-WT        | Two-hybrid control plasmid containing wild-type RalGDS domain; Gm <sup>r</sup>                                                                                       | Invitrogen                        |
| pDEST32-RalGDS-m2        | Two-hybrid control plasmid containing mutated RalGDS domain; Gm <sup>r</sup>                                                                                         | Invitrogen                        |
| pBT212                   | GateWay compatible plasmid containing <i>gfpmut3</i> flanked by attR5 and attL1 recombination sites; Kn <sup>r</sup>                                                 | (Armbruster <i>et al.</i> , 2019) |
| pBT244                   | GateWay-compatible plasmid containing a null promoter flanked by attL2 and attL5 recombination sites; Kn <sup>r</sup>                                                | (Tseng <i>et al.</i> , 2013)      |
| pBT336                   | pUCP22T2.1 containing <i>gfpmut3</i> driven by a null promoter; Ap <sup>r</sup> , Gm <sup>r</sup>                                                                    | This study                        |
| pBT342                   | pDONRPEX18Gm with an in-frame deletion allele of <i>algD</i> ; Gm <sup>r</sup>                                                                                       | (Tseng <i>et al.</i> , 2013)      |
| pBT396                   | pDONRPEX18Gm with an in-frame deletion allele of <i>mucA</i> ; Gm <sup>r</sup>                                                                                       | This study                        |
| pBT399                   | pUC18-miniTn7T2 with an allele encoding all 194 aa of <i>mucA</i> , driven by its native promoter; Ap <sup>r</sup> , Gm <sup>r</sup>                                 | This study                        |
| pBT406                   | pUC18-miniTn7T2 with an allele encoding the first 50 aa of <i>mucA</i> , driven by its native promoter; Ap <sup>r</sup> , Gm <sup>r</sup>                            | This study                        |
| pBT407                   | pUC18-miniTn7T2 with an allele encoding the first 110 aa of <i>mucA</i> , driven by its native promoter; Ap <sup>r</sup> , Gm <sup>r</sup>                           | This study                        |
| pBT408                   | pUC18-miniTn7T2 with an allele encoding the first 75 aa of <i>mucA</i> , driven by its native promoter; Ap <sup>r</sup> , Gm <sup>r</sup>                            | This study                        |

|         |                                                                                                                                                            |            |
|---------|------------------------------------------------------------------------------------------------------------------------------------------------------------|------------|
| pBT410  | pUC18-miniTn7T2 with an allele encoding the first 62 aa of <i>mucA</i> , driven by its native promoter; Ap <sup>r</sup> , Gm <sup>r</sup>                  | This study |
| pBT411  | pDONRPEX18Gm with an in-frame deletion allele of <i>algU</i> ; Gm <sup>r</sup>                                                                             | This study |
| pBT412  | pDONRPEX18Gm with an in-frame deletion allele of <i>mucA</i> , for use in a $\Delta$ <i>algU</i> background; Gm <sup>r</sup>                               | This study |
| pBT413  | pUC18-miniTn7T2 with an allele encoding the first 40 aa of <i>mucA</i> , driven by its native promoter; Ap <sup>r</sup> , Gm <sup>r</sup>                  | This study |
| pBT414  | pUC18-miniTn7T2 with an allele encoding the first 24 aa of <i>mucA</i> , driven by its native promoter; Ap <sup>r</sup> , Gm <sup>r</sup>                  | This study |
| pBT435  | pUCP22T2.1 containing <i>gfpmut3</i> driven by the <i>algD</i> promoter; Ap <sup>r</sup> , Gm <sup>r</sup>                                                 | This study |
| pMS009  | pUC18-miniTn7T2 with an allele encoding the aa 51-195 of <i>mucA</i> , driven by its native promoter; Ap <sup>r</sup> , Gm <sup>r</sup>                    | This study |
| pMS014  | pDONRPEX18Gm with an in-frame deletion allele of <i>algB</i> ; Gm <sup>r</sup>                                                                             | This study |
| pMS015  | pDONRPEX18Gm with an in-frame deletion allele of <i>algR</i> ; Gm <sup>r</sup>                                                                             | This study |
| pMS023  | pUC18-miniTn7T2 with an allele encoding the first 143 aa of <i>mucA</i> , driven by its native promoter; Ap <sup>r</sup> , Gm <sup>r</sup>                 | This study |
| pMS024  | pUC18-miniTn7T2 with an allele encoding the first 155 aa of <i>mucA</i> , driven by its native promoter; Ap <sup>r</sup> , Gm <sup>r</sup>                 | This study |
| pMS034  | pUC18-miniTn7T2 with an allele encoding an R42A substitution in <i>mucA</i> , driven by its native promoter; Ap <sup>r</sup> , Gm <sup>r</sup>             | This study |
| pMS035  | pUC18-miniTn7T2 with an allele encoding a D15A substitution in <i>mucA</i> , driven by its native promoter; Ap <sup>r</sup> , Gm <sup>r</sup>              | This study |
| pMS037  | miniCTX2T2.1-GW with an allele encoding <i>rpoD</i> driven by an arabinose-inducible promoter; Tc <sup>r</sup>                                             | This study |
| pMS039  | pUC18-miniTn7T2 with an allele encoding an E22A substitution in <i>mucA</i> , driven by its native promoter; Ap <sup>r</sup> , Gm <sup>r</sup>             | This study |
| pMS041  | pUC18-miniTn7T2 with an allele encoding an E46G substitution in <i>algU</i> , driven by its native promoter; Ap <sup>r</sup> , Gm <sup>r</sup>             | This study |
| pMS050  | pUC18-miniTn7T2 with an allele encoding an K57A substitution in <i>algU</i> , driven by an arabinose-inducible promoter; Ap <sup>r</sup> , Gm <sup>r</sup> | This study |
| pAAK001 | pDEST22 based expression plasmid encoding AlgU fused to the Gal4 activating domain                                                                         | This study |
| pAAK002 | pDEST32 based expression plasmid encoding AlgU fused to the Gal4 DNA binding domain                                                                        | This study |
| pAAK003 | pDEST22 based expression plasmid encoding the first 75 aa of MucA fused to the Gal4 activating domain                                                      | This study |
| pAAK004 | pDEST32 based expression plasmid encoding the first 75 aa of MucA fused to the Gal4 activating domain                                                      | This study |
| pAAK014 | pUC18-miniTn7T2 with an allele encoding full length <i>algU</i> , driven by its native promoter; Ap <sup>r</sup> , Gm <sup>r</sup>                         | This study |
| pAAK018 | pUC18-miniTn7T2 with an allele encoding an N81A substitution in <i>algU</i> , driven by its native promoter; Ap <sup>r</sup> , Gm <sup>r</sup>             | This study |
| pAAK020 | pUC18-miniTn7T2 with an allele encoding an K57A substitution in <i>algU</i> , driven by its native promoter; Ap <sup>r</sup> , Gm <sup>r</sup>             | This study |
| pAAK021 | pUC18-miniTn7T2 with an allele encoding an A58T substitution in <i>algU</i> , driven by its native promoter; Ap <sup>r</sup> , Gm <sup>r</sup>             | This study |
| pAAK033 | pDEST32 based expression plasmid encoding the first 75 aa of MucA with an R42A substitution fused to the Gal4 activating domain                            | This study |

|         |                                                                                                                                 |            |
|---------|---------------------------------------------------------------------------------------------------------------------------------|------------|
| pAAK034 | pDEST32 based expression plasmid encoding the first 75 aa of MucA with an D15A substitution fused to the Gal4 activating domain | This study |
| pAAK042 | pDEST32 based expression plasmid encoding the first 75 aa of MucA with an E22A substitution fused to the Gal4 activating domain | This study |
| pCT2    | pUC18-miniTn7T2 with an allele encoding AlgU, driven by an arabinose-inducible promoter; Ap <sup>r</sup> , Gm <sup>r</sup>      | This study |
| pLM7    | pUC18T-miniTn7T with an allele encoding MucA, driven by a rhamnose-inducible promoter; Gm <sup>r</sup>                          | This study |

**Table S7. Oligonucleotides used in this study.**

| <b>Primer</b>                          | <b>Sequence</b>                                                                                       |
|----------------------------------------|-------------------------------------------------------------------------------------------------------|
| OBT401 ( <i>algD</i> SeqF)             | AGCCCTTGTGGCGAATAG                                                                                    |
| OBT402 ( <i>algD</i> SeqR)             | GCTTGTGCCACTCGCTC                                                                                     |
| OMS103 ( <i>algR</i> SeqF)             | CTCGAGGCTGGCGTAGGTG                                                                                   |
| OMS104 ( <i>algR</i> UpF)              | ggggacaagtttgtacaaaaaagcaggctcaGCAGATGGTGTAGAGGCCGAG                                                  |
| OMS105 ( <i>algR</i> UpR)              | AGGCGTCTGATGCATCAGCTC                                                                                 |
| OMS106 ( <i>algR</i> DownF)            | gagctgatgcatcagacgcctCATAAGCTCAGGCTTCCTGCATG                                                          |
| OMS107 ( <i>algR</i> DownR)            | ggggaccacttttgtacaagaaagctgggtaCAACTGGACTGGCAGGTGCAC                                                  |
| OMS108 ( <i>algR</i> SeqR)             | GCTGGACCTGTCCGACCTGTTC                                                                                |
| OMS109 ( <i>algB</i> SeqF)             | GGTAGCGAACCGGCCTGTGTC                                                                                 |
| OMS110 ( <i>algB</i> UpF)              | ggggacaagtttgtacaaaaaagcaggctcaCCGCATGCCAGCCTTTCTG                                                    |
| OMS111 ( <i>algB</i> UpR)              | CAGCAGGATGCGCCCCTG                                                                                    |
| OMS112 ( <i>algB</i> DownF)            | caggggagcgcacctctgctgCAGTACGGCCTATGAGCATGC                                                            |
| OMS113 ( <i>algB</i> DownR)            | ggggaccacttttgtacaagaaagctgggtattCGCTGAAGCCGTCGTTGTC                                                  |
| OMS114 ( <i>algB</i> SeqR)             | CTTCGCTGATGCCGGCCAG                                                                                   |
| OMS115 ( <i>amrZ</i> SeqF)             | GATGCTGCCGCGTTGTC                                                                                     |
| OMS116 ( <i>amrZ</i> SeqR)             | CCAGCCTACGATTCGCCTC                                                                                   |
| OBT597 ( <i>mucA</i> UpF)              | ggggacaagtttgtacaaaaaagcaggctcaCAGAGGATGCGGAGTTCTTCG<br>AG                                            |
| OBT598 ( <i>mucA</i> UpR)              | ctcctcagcggttttccaggctCTGCAGGGCTTCACGACTCATAG                                                         |
| OBT599 ( <i>mucA</i> DownF)            | ctatgagtcgtgaagccctgcagAGCCTGGAAAACCGCTGAGGAG                                                         |
| OBT600 ( <i>mucA</i> DownR)            | ggggaccacttttgtacaagaaagctgggtaCTGGGCATCGGCCAGTTGGTC                                                  |
| OBT601 ( <i>mucA</i> SeqF)             | GCCATCAACACCGCGAAGAAC                                                                                 |
| OBT602 ( <i>mucA</i> SeqR)             | TCGTACCAGGAAGCCAGCTG                                                                                  |
| OBT603 ( <i>algU</i> promoter UpF)     | ggggacaagtttgtacaaaaaagcaggctcaCGCTGCCGATGACCAGTACAT<br>C                                             |
| OBT604B ( <i>algU</i> promoter<br>UpR) | cttctcgcaacaaggtgcagTTGCTGATCCTGTTTCTGGGTTAGC                                                         |
| OBT605B ( <i>mucA</i> DownF)           | gctaaccagggaacaggatcagcaaCTGCAGCCTTTGTTGCGAGAAG                                                       |
| OBT606B ( <i>mucA</i> DownR)           | GGGGACCACTTTGTACAAGAAAGCTGGGTAttattagtggtggtgatggtga<br>tgatggtggtgatggtgctgcccGTCTCTCCTCAGCGTTTTCCAG |
| OBT620 (MucA 1-194 aa)                 | CAGCCTGGAAAACCGCGGCAGCAGCCATCAC                                                                       |
| OBT621 (MucA 1-194 aa)                 | GTGATGGCTGCTGCCGCGGTTTTCCAGGCTG                                                                       |
| OBT622 (MucA 1-50 aa)                  | GGCGCGGTCCGTCATGGGCAGCAGCCATCAC                                                                       |
| OBT623 (MucA 1-50 aa)                  | GTGATGGCTGCTGCCCATGACGGACCGCGCC                                                                       |
| OBT624 (MucA 1-110 aa)                 | GTACAACCAGAACGACGGCAGCAGCCATCAC                                                                       |
| OBT625 (MucA 1-110 aa)                 | GTGATGGCTGCTGCCGTCGTTCTGGTTGTAC                                                                       |
| OBT673 (MucA 1-75 aa)                  | GACGAGGCCGCTCCGGGCAGCAGCCATCAC                                                                        |
| OBT674 (MucA 1-75 aa)                  | GTGATGGCTGCTGCCCGGAGCGGCCTCGTC                                                                        |
| OBT679 (MucA 1-62 aa)                  | GAAGCTGGATATCGCTGGCAGCAGCCATCAC                                                                       |
| OBT680 (MucA 1-62 aa)                  | GTGATGGCTGCTGCCAGCGATATCCAGCTTC                                                                       |
| OBT681 ( <i>algU</i> UpF)              | ggggacaagtttgtacaaaaaagcaggctcgGTGCTGGAACCTTTCTTAGACG<br>CATC                                         |
| OBT682 ( <i>algU</i> UpR)              | gtgtcaggcttctcgcaacaaggtCTGATCCTGTTTCTGGGTTAGCATG                                                     |
| OBT683 ( <i>algU</i> DownF)            | catgctaaccagggaacaggatcagCCTTTGTTGCGAGAAGCCTGACAC                                                     |
| OBT684 ( <i>algU</i> DownR)            | ggggaccacttttgtacaagaaagctgggtaTGGTCCCCTGTTGCGCCATTTG                                                 |
| OBT685 ( <i>algU</i> SeqF)             | ATGAGCTGCGGGCCTGTATC                                                                                  |
| OBT686 ( <i>algU</i> SeqR)             | GGACGAGGAGTTGGTGATCACCTG                                                                              |



|                                                     |                                                                                                      |
|-----------------------------------------------------|------------------------------------------------------------------------------------------------------|
| OBT687 ( <i>mucA</i> UpF for $\Delta$ <i>algU</i> ) | ggggacaagtttgtacaaaaaagcagggtcaGTTCCAAAGCAGGATGCCTGA<br>AGAC                                         |
| OBT690 ( <i>MucA</i> 1-40 aa)                       | CTGCGTTCACCTGGGGCAGCAGCCATCAC                                                                        |
| OBT691 ( <i>MucA</i> 1-40 aa)                       | GTGATGGCTGCTGCCCCAGGTGGAACGCAG                                                                       |
| OBT694 ( <i>MucA</i> 1-24 aa)                       | GAACTCGAGTTGCGGGGCAGCAGCCATCAC                                                                       |
| OBT695 ( <i>MucA</i> 1-24 aa)                       | GTGATGGCTGCTGCCCCGCAACTCGAGTTC                                                                       |
| OMS077 ( <i>MucA</i> 51-195 aa)                     | gctaaccaggaacaggatcagcaaCACCGCGAGCCTACCCTG                                                           |
| OMS078 ( <i>MucA</i> 51-195 aa)                     | GGGGACCACTTTGTACAAGAAAGCTGGGTAttattagtggtggtgatggtga<br>tgatggtggtgatggctgctgccGCGGTTTTCCAGGCTGGCTG  |
| OMS118 ( <i>mucA</i> UpF)                           | CAGAGGATGCGGAGTTCTTCGAG                                                                              |
| OMS119 ( <i>mucA</i> DownR)                         | CTGGGCATCGGCCAGTTGGTC                                                                                |
| OMS132 ( <i>MucA</i> 1-143 aa)                      | CTACAGCGAAGAGCAGGGGGGCAGCAGCCATCAC                                                                   |
| OMS133 ( <i>MucA</i> 1-143 aa)                      | GTGATGGCTGCTGCCCCCTGCTCTTCGCTGTAG                                                                    |
| OMS158 ( <i>MucA</i> 1-155 aa)                      | GGGGACCACTTTGTACAAGAAAGCTGGGTAttattagtggtggtgatggtga<br>tgatggtggtgatggctgctgccATCGCTGGACGAGGAGTTGGT |
| OMS173 ( <i>MucA</i> R42A)                          | GAGCTGCGTTCCACCTGGTCGGCCTACCAGTTGGCGCGGTCCGTC                                                        |
| OMS174 ( <i>MucA</i> R42A)                          | GACGGACCGGCCAACTGGTAGGCCGACCAGGTGGAACGCAGCTC                                                         |
| OMS175 ( <i>MucA</i> D15A)                          | CAGGAACTCTGTCCGCTGTGATGGCCAACGAAGCGGATGAACTCGAG                                                      |
| OMS176 ( <i>MucA</i> D15A)                          | CTCGAGTTCATCCGCTTCGTTGGCCATCACAGCGGACAGAGTTTCCTG                                                     |
| OMS214 ( <i>MucA</i> E22A)                          | GAAGCGGATGAACTCGCCTTGC GGCGGGTGCTC                                                                   |
| OMS215 ( <i>MucA</i> E22A)                          | GAGCACCCGCCGAAGGCGAGTTCATCCGCTTC                                                                     |
| OMS218 ( <i>AlgU</i> E46G)                          | GCCCTGGGCGTCGTGCACGAACCGCAC                                                                          |
| OMS182 ( <i>rpoD</i> DownR)                         | ggggaccactttgtacaagaaagctgggtagcatttgccgctgtgTCACTCG<br>TCGAGGAAGGAGCGAAG                            |
| OMS216 ( <i>rpoD</i> UpF)                           | ggggacaactttgtatacaaaaagttgcaaagaggaggtattaagcATGTCC<br>GGAAAAGCGCAACAGCA                            |
| OAK2 ( <i>algU</i> DownR)                           | GGGGACCACTTTGTACAAGAAAGCTGGGTAttattaAGCGTAATCTGGAACA<br>TCGTATGGGTAgctgctgccGGCTTCTCGCAACAAAGGCTG    |
| OAK12 ( <i>algU</i> promoter UpF)                   | ggggacaagtttgtacaaaaaagcagggtcaCCTTGCTGAGGACGGCGATG                                                  |
| OAK20 ( <i>AlgU</i> N81A UpR)                       | GTTCTTCGCGGTGGCGATGGCGATCCGATAC                                                                      |
| OAK21 ( <i>AlgU</i> N81A DownF)                     | GTATCGGATCGCCATCGCCACCGCAAGAAC                                                                       |
| OAK22 ( <i>AlgU</i> K57A UpR)                       | AGCGCACGGTATGCGGCGATGAAGGCTTC                                                                        |
| OAK23 ( <i>AlgU</i> K57A DownF)                     | GAAGCCTTCATCGCCGCATACCGTGCGCT                                                                        |
| OAK26 ( <i>AlgU</i> A58T UpR)                       | GAGCGCACGGTAGGTCTTGATGAAGGCTTC                                                                       |
| OAK27 ( <i>AlgU</i> A58T DownF)                     | GAAGCCTTCATCAAGACCTACCGTGCGCTC                                                                       |
| OAK29 ( <i>AlgU</i> E46G DownF)                     | CTACGTCCTGGGCGCCCTGGGCGTCGTG                                                                         |
| OAK30 ( <i>AlgU</i> E46G UpR)                       | CACGACGCCCAGGGCGCCCAGGACGTAG                                                                         |
| OCT1 ( <i>AlgU</i> UpF)                             | GGGGACAACCTTTGTATACAAAAGTTGCGaaagaggaggtattaagcATGCTA<br>ACCCAGGAACAGGATCAG                          |
| OCT2 ( <i>AlgU</i> DownR)                           | GGGGACCACTTTGTACAAGAAAGCTGGGTAttattagtggtggtgatggtga<br>tgatggtggtgatggctgctgccGGCTTCTCGCAACAAAGGCTG |
| OLM24 ( <i>MucA</i> Fwd)                            | TACAGTaaagcttGCCTTTGTTGCGAGAAGCCTGAC                                                                 |
| OLM25 ( <i>MucA</i> Rev)                            | TGCTTAgggcccGCCTGCAGGTGACTCTAGAG                                                                     |
| OBT342 ( <i>GFP</i> DownR)                          | GGGGACAAGTTTGTACAAAAAAGCAGGCTCGTTACTTGTACAGCTCGTCCAT<br>GCC                                          |
| OBT846 ( <i>algD</i> promoter UpF)                  | ggggACCACTTTGTACAAGAAAGCTGGGTaCTGATGAAGCTTTCCGACAAGC<br>TC                                           |
| OBT847 ( <i>algD</i> promoter UpR)                  | cagtgaaaagttcttctccttttacgcatCGCATTACCTCGATTGTTTGTCTG                                                |
| OBT848 ( <i>GFP</i> DownF)                          | ATGCGTAAAGGAGAAGAACTTTTCACTG                                                                         |

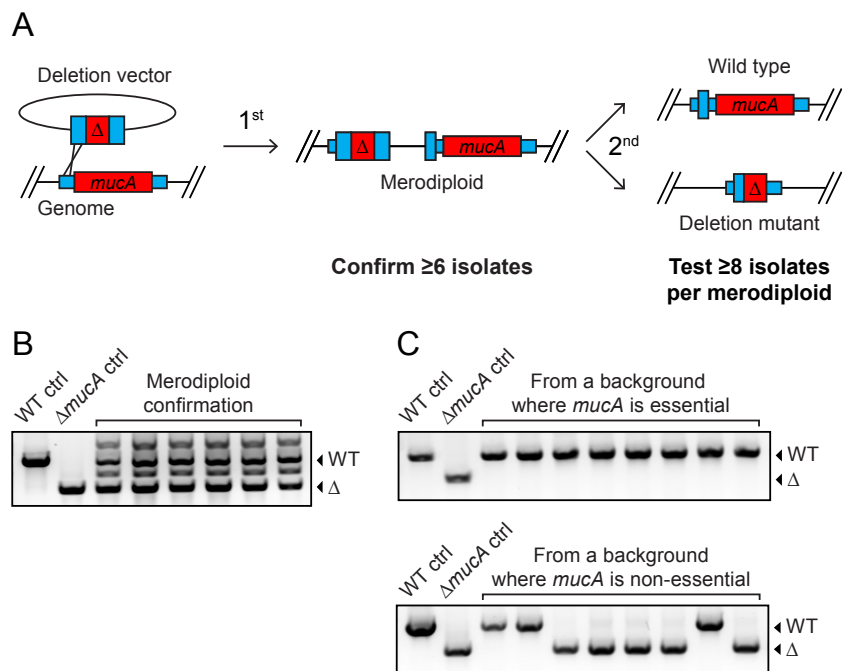

**Figure S1. Allelic exchange assay.**

**(A)** Schematic of assay. To delete the endogenous *mucA* (short red box with *mucA*) from the genome, the deletion vector pBT396, which contains an allele of *mucA* that is missing >95% of the coding region (tall red box with delta), was introduced into *P. aeruginosa* via conjugation. Regions of homology (tall blue boxes) to the genome (short blue boxes) approximately 400 base pairs in length flank the deletion allele and allow for recombination into the genome (X) to create a merodiploid. This first recombination event (1<sup>st</sup>) can be selected for using antibiotics due to integration of the vector backbone, which contains a gentamicin resistance marker. At least six merodiploids were confirmed via PCR to ensure the genome contained both the deletion and endogenous *mucA* allele. Merodiploids can then undergo a second recombination event (2<sup>nd</sup>) that will lead to the loss of one of the two alleles, resolving to either the endogenous or deletion allele, which results in a cell that is either wild-type (top) or a deletion mutant (bottom), respectively. For each of the six confirmed merodiploids, we counter-selected for the second recombination event via the loss of *sacB*, a vector backbone marker. Using PCR, eight isolates per merodiploid were tested to determine which allele each isolate resolved to. If a gene is non-essential, we expect to observe both wild type or deletion mutants. However, if a gene is essential, we expect to isolate only those cells that resolved to wild type, as the cells cannot survive with the deletion allele. If we are unable to delete *mucA* from the first replicate of this experiment, we perform two additional biological replicates, for a minimum total of 125 colonies screened. If all isolates resolve to wild-type, we deem *mucA* to be essential in that strain background ( $p < 0.0001$ , Fisher's exact test). **(B)** Representative image of merodiploid confirmation. The PCR products corresponding to the endogenous allele and the deletion allele are indicated with an arrow labelled "WT" and "Δ," respectively. Positive (WT ctrl; PAO1) and negative ( $\Delta$ *mucA* ctrl; BTPa355) controls are included. PCR products from six representative merodiploids are shown. **(C)** Representative image of PCR products from isolates after the second recombination. Image is labeled as in (B). Top, the PCR products of 8 isolates from a strain in which *mucA* was deemed essential. Bottom, the PCR products of 8 isolates from a strain in which *mucA* was not essential.

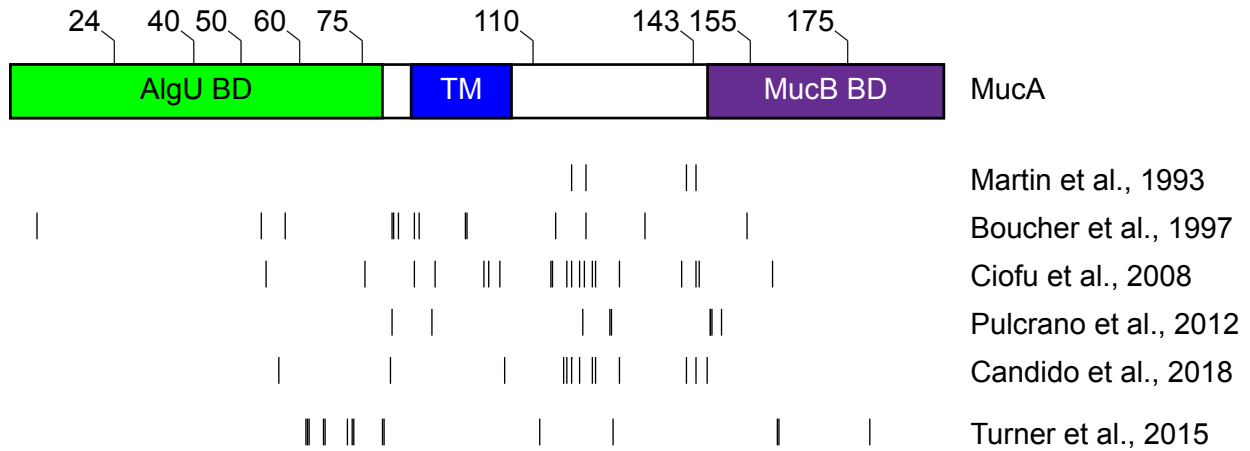

**Figure S2. Published mutations in *mucA*.**

Top, schematic of MucA with the regions indicated encoding for the AlgU binding domain (green, AlgU BD), the transmembrane domain (blue, TM), and the MucB binding domain (purple, MucB BD). Hash marks on top indicate the residue number in MucA. Bottom, sites of *mucA* mutations that lead to the production of a truncated protein in published isolates. Each line represents one or more individual isolates described in the references on the right. The mutations for the upper five references (Boucher *et al.*, 1997, Candido Cacador *et al.*, 2018, Ciofu *et al.*, 2008, Martin *et al.*, 1993, Pulcrano *et al.*, 2012) are in cystic fibrosis clinical isolates of *P. aeruginosa*, while the mutations in the last reference (Turner *et al.*, 2015) are random transposon insertions in the laboratory PAO1 and PA14 strains.

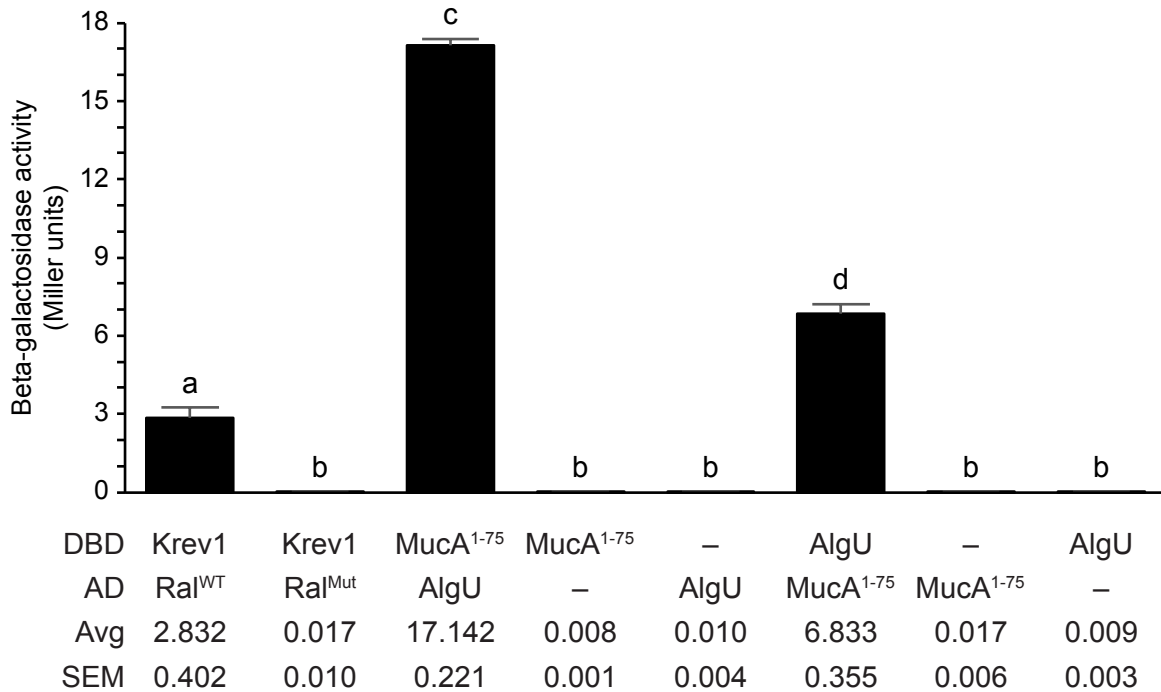

**Figure S3. MucA aa 1-75 and AlgU interact via yeast two-hybrid assay.**

The indicated proteins were fused to the Gal4 DNA binding domain (DBD; “bait”) or the Gal4 activation domain (AD; “prey”). Interaction of the bait and prey proteins drive the expression of *lacZ*. Beta-galactosidase activity (in Miller units) was used as a proxy for the protein interaction strength. The average (Avg) and standard error of the mean (SEM) of each bar are indicated (N=3). As positive and negative controls, Krev1 is known to interact with wild-type RalGDS (Ral<sup>WT</sup>), but not the mutant RalGDS (Ral<sup>Mut</sup>) via yeast two-hybrid. AlgU, construct encoding full-length wild-type AlgU; MucA<sup>1-75</sup>, construct encoding only the first 75 residues of wild-type MucA; –, no fusion protein included; error bars, SEM (N=3); letters, statistical groups with the different letters representing statistically different groups ( $p < 0.01$ ; biological triplicate with technical quadruplicates; ANOVA with post-hoc Tukey HSD).

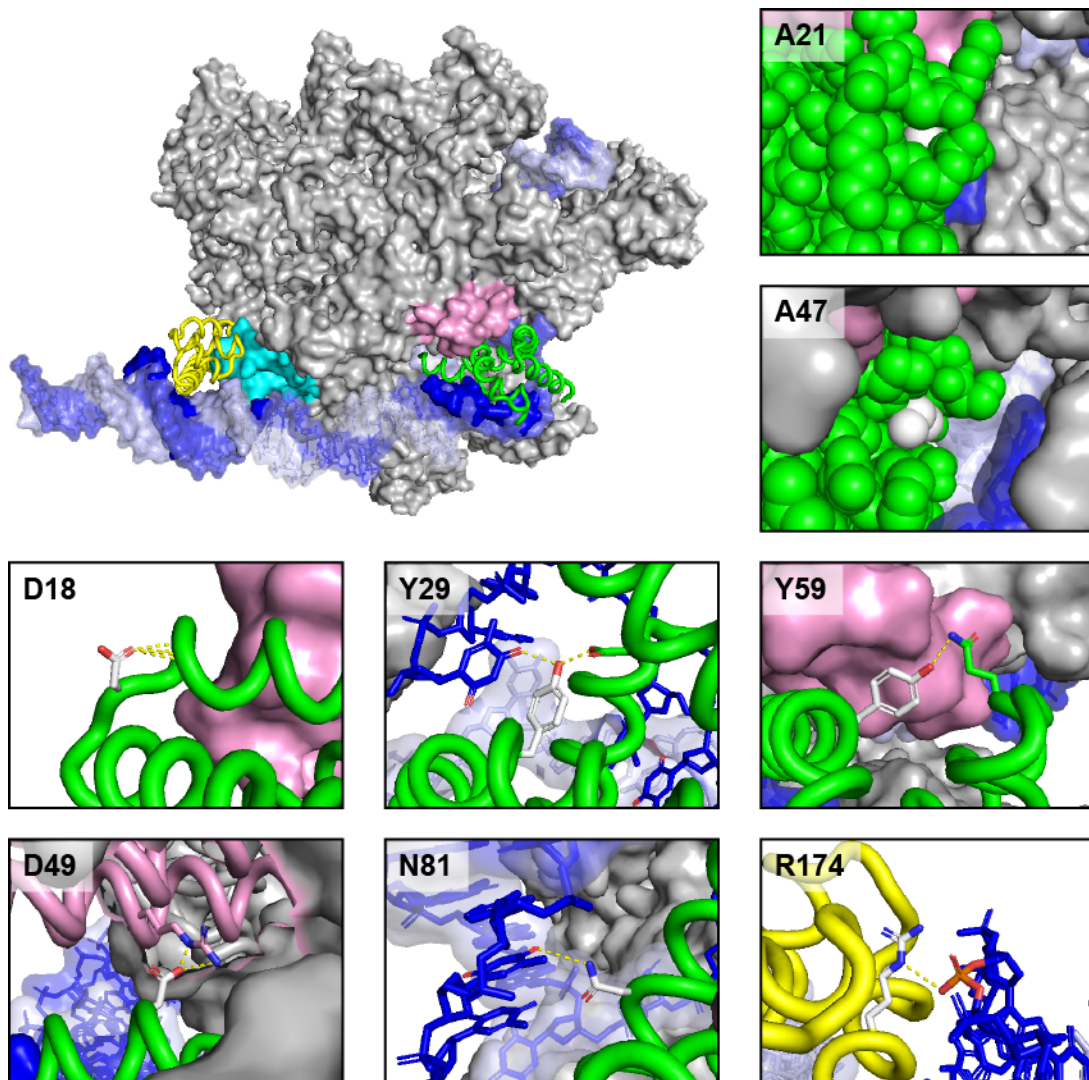

**Figure S4. Location of affected AlgU residues in revertants that can grow in the absence of MucA.**

Model of the RNAP holoenzyme containing  $\sigma^E$  bound to the promoter. Gray, RNAP core; cyan,  $\beta$  flap; pink,  $\beta'$  coiled coil; green,  $\sigma^E$  Region 2; yellow,  $\sigma^E$  Region 4; blue/light blue, promoter element. Insets, location of residues that are substituted in the revertants with missense *algU* mutations. The side chain of the affected residue is in white. Substitution of A21 and A47 (V in model) likely affect protein packing and folding of AlgU. Substitution of D18, Y29, and Y59 would reduce predicted intra- and inter-molecular hydrogen bonding and likely affect AlgU folding. Substitution of D49, N81, and R174 would likely affect the interaction of AlgU with the RNAP core or the promoter. Dashed yellow lines, hydrogen bonds; red atoms, oxygen; blue atoms, nitrogen; orange, phosphorus.

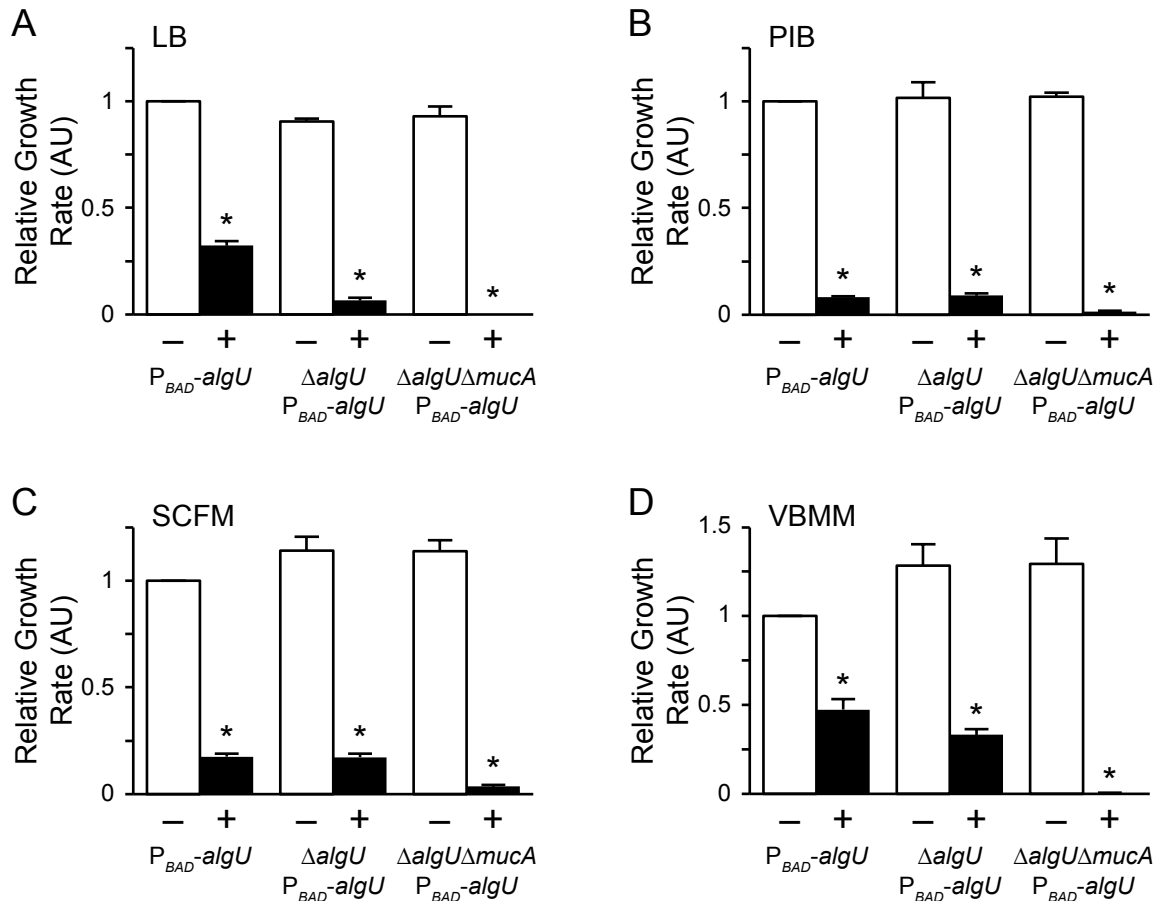

**Figure S5. Overexpression of *algU* in the absence of *mucA* causes a growth defect in various media.**

Growth rate of indicated strains grown in (A) LB, (B) PIB, (C) SCFM, and (D) VBMM with (+) or without (-) 1% arabinose (relative to PAO1 *attTn7::P<sub>araBAD</sub>-algU* grown in the absence of arabinose). Error bars, SEM (N=3). Asterisk, statistically different from the same strain grown in the absence of arabinose ( $p < 0.01$ , N = 3, two-way ANOVA with post-hoc Bonferroni). See Table S3 for full statistical comparisons. LB contains tryptone and yeast extract, both of which provide protein hydrolyates, as the main carbon source. The main carbon source of PIB is also protein hydrolyates, but from pancreatic gelatin digest. While PIB also contains glycerol, which can serve as a carbon source, it is not a preferred carbon source for *Pseudomonas aeruginosa*. SCFM is a defined medium that contains amino acids as the primary carbon source, and mimics the nutrients found in the CF lung environment. VBMM is a minimal medium that contains citrate as the sole carbon source.

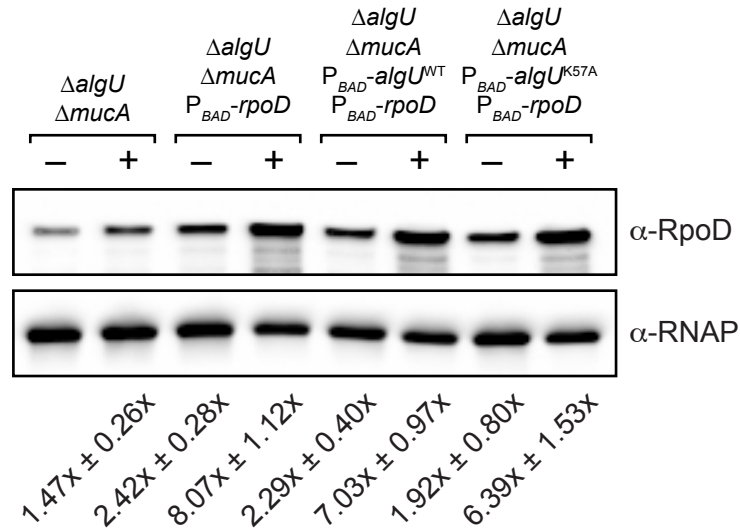

**Figure S6. RpoD production in strains with an ectopic inducible *rpoD* allele.**

Expression of *rpoD* was inferred via semi-quantitative Western blot in the indicated strains (top). RNAP was used as a loading control (bottom). Strains were grown in LB with (+) or without (-) 2% arabinose. The relative amount of RpoD is indicated, where 1.00x represents RpoD levels in the parental strain without arabinose ( $\pm$  SD; N=3). While the strains produce significantly more RpoD in the presence of arabinose relative to the same strain in the absence of arabinose ( $p < 0.01$ ), there is no statistical difference in the amount of RpoD produced from the induced strains containing an ectopic *rpoD* allele (two-way ANOVA with post-hoc Bonferroni).

## SUPPLEMENTARY REFERENCES

- Almblad, H., Harrison, J.J., Rybtke, M., Groizeleau, J., Givskov, M., Parsek, M.R., and Tolker-Nielsen, T. (2015) The Cyclic AMP-Vfr Signaling Pathway in *Pseudomonas aeruginosa* Is Inhibited by Cyclic Di-GMP. *J Bacteriol* **197**: 2190-2200.
- Armbruster, C.R., Lee, C.K., Parker-Gilham, J., de Anda, J., Xia, A., Zhao, K., Murakami, K., Tseng, B.S., Hoffman, L.R., Jin, F., Harwood, C.S., Wong, G.C., and Parsek, M.R. (2019) Heterogeneity in surface sensing suggests a division of labor in *Pseudomonas aeruginosa* populations. *Elife* **8**.
- Bae, B., Davis, E., Brown, D., Campbell, E.A., Wigneshweraraj, S., and Darst, S.A. (2013) Phage T7 Gp2 inhibition of *Escherichia coli* RNA polymerase involves misappropriation of 70 domain 1.1. *Proceedings of the National Academy of Sciences* **110**: 19772-19777.
- Boucher, J.C., Yu, H., Mudd, M.H., and Deretic, V. (1997) Mucoid *Pseudomonas aeruginosa* in cystic fibrosis: characterization of muc mutations in clinical isolates and analysis of clearance in a mouse model of respiratory infection. *Infect Immun* **65**: 3838-3846.
- Boyaci, H., Chen, J., Jansen, R., Darst, S.A., and Campbell, E.A. (2019) Structures of an RNA polymerase promoter melting intermediate elucidate DNA unwinding. *Nature* **565**: 382-385.
- Campagne, S., Marsh, M.E., Capitani, G., Vorholt, J.A., and Allain, F.H. (2014) Structural basis for -10 promoter element melting by environmentally induced sigma factors. *Nat Struct Mol Biol* **21**: 269-276.
- Campbell, E.A., Tupy, J.L., Gruber, T.M., Wang, S., Sharp, M.M., Gross, C.A., and Darst, S.A. (2003) Crystal structure of *Escherichia coli* sigmaE with the cytoplasmic domain of its anti-sigma RseA. *Mol Cell* **11**: 1067-1078.
- Candido Cacador, N., Paulino da Costa Capizzani, C., Gomes Monteiro Marin Torres, L.A., Galetti, R., Ciofu, O., da Costa Darini, A.L., and Hoiby, N. (2018) Adaptation of *Pseudomonas aeruginosa* to the chronic phenotype by mutations in the algTmucABD operon in isolates from Brazilian cystic fibrosis patients. *PLoS One* **13**: e0208013.
- Choi, K.H., Kumar, A., and Schweizer, H.P. (2006) A 10-min method for preparation of highly electrocompetent *Pseudomonas aeruginosa* cells: application for DNA fragment transfer between chromosomes and plasmid transformation. *J Microbiol Methods* **64**: 391-397.
- Choi, K.H., and Schweizer, H.P. (2006) mini-Tn7 insertion in bacteria with single attTn7 sites: example *Pseudomonas aeruginosa*. *Nat Protoc* **1**: 153-161.
- Ciofu, O., Lee, B., Johannesson, M., Hermansen, N.O., Meyer, P., and Hoiby, N. (2008) Investigation of the algT operon sequence in mucoid and non-mucoid *Pseudomonas aeruginosa* isolates from 115 Scandinavian patients with cystic fibrosis and in 88 in vitro non-mucoid revertants. *Microbiology* **154**: 103-113.
- Damron, F.H., Qiu, D., and Yu, H.D. (2009) The *Pseudomonas aeruginosa* sensor kinase KinB negatively controls alginate production through AlgW-dependent MucA proteolysis. *J Bacteriol* **191**: 2285-2295.
- Deatherage, D.E., and Barrick, J.E. (2014) Identification of mutations in laboratory-evolved microbes from next-generation sequencing data using breseq. *Methods Mol Biol* **1151**: 165-188.
- Frank, D.W., Nair, G., and Schweizer, H.P. (1994) Construction and characterization of chromosomal insertional mutations of the *Pseudomonas aeruginosa* exoenzyme S trans-regulatory locus. *Infect Immun* **62**: 554-563.
- Fulcher, N.B., Holliday, P.M., Klem, E., Cann, M.J., and Wolfgang, M.C. (2010) The *Pseudomonas aeruginosa* Chp chemosensory system regulates intracellular cAMP levels by modulating adenylate cyclase activity. *Mol Microbiol* **76**: 889-904.
- Hmelo, L.R., Borlee, B.R., Almblad, H., Love, M.E., Randall, T.E., Tseng, B.S., Lin, C., Irie, Y., Storek, K.M., Yang, J.J., Siehnel, R.J., Howell, P.L., Singh, P.K., Tolker-Nielsen, T., Parsek, M.R., Schweizer, H.P., and Harrison, J.J. (2015) Precision-engineering the



- Pseudomonas aeruginosa* genome with two-step allelic exchange. *Nat Protoc* **10**: 1820-1841.
- Hoang, T.T., Kutchma, A.J., Becher, A., and Schweizer, H.P. (2000) Integration-proficient plasmids for *Pseudomonas aeruginosa*: site-specific integration and use for engineering of reporter and expression strains. *Plasmid* **43**: 59-72.
- Holloway, B.W. (1955) Genetic recombination in *Pseudomonas aeruginosa*. *J Gen Microbiol* **13**: 572-581.
- Intile, P.J., Diaz, M.R., Urbanowski, M.L., Wolfgang, M.C., and Yahr, T.L. (2014) The AlgZR two-component system recalibrates the RsmAYZ posttranscriptional regulatory system to inhibit expression of the *Pseudomonas aeruginosa* type III secretion system. *J Bacteriol* **196**: 357-366.
- Jones, A.K., Fulcher, N.B., Balzer, G.J., Urbanowski, M.L., Pritchett, C.L., Schurr, M.J., Yahr, T.L., and Wolfgang, M.C. (2010) Activation of the *Pseudomonas aeruginosa* AlgU regulon through mucA mutation inhibits cyclic AMP/Vfr signaling. *J Bacteriol* **192**: 5709-5717.
- Khakimova, M., Ahlgren, H.G., Harrison, J.J., English, A.M., and Nguyen, D. (2013) The stringent response controls catalases in *Pseudomonas aeruginosa* and is required for hydrogen peroxide and antibiotic tolerance. *J Bacteriol* **195**: 2011-2020.
- Kristensen, C.S., Eberl, L., Sanchez-Romero, J.M., Givskov, M., Molin, S., and De Lorenzo, V. (1995) Site-specific deletions of chromosomally located DNA segments with the multimer resolution system of broad-host-range plasmid RP4. *J Bacteriol* **177**: 52-58.
- Lane, W.J., and Darst, S.A. (2006) The structural basis for promoter -35 element recognition by the group IV sigma factors. *PLoS Biol* **4**: e269.
- Martin, D.W., Schurr, M.J., Mudd, M.H., Govan, J.R., Holloway, B.W., and Deretic, V. (1993) Mechanism of conversion to mucoidy in *Pseudomonas aeruginosa* infecting cystic fibrosis patients. *Proc Natl Acad Sci U S A* **90**: 8377-8381.
- Meisner, J., and Goldberg, J.B. (2016) The Escherichia coli rhaSR-PrhaBAD Inducible Promoter System Allows Tightly Controlled Gene Expression over a Wide Range in *Pseudomonas aeruginosa*. *Appl Environ Microbiol* **82**: 6715-6727.
- Palmer, K.L., Aye, L.M., and Whiteley, M. (2007) Nutritional cues control *Pseudomonas aeruginosa* multicellular behavior in cystic fibrosis sputum. *J Bacteriol* **189**: 8079-8087.
- Pritchett, C.L., Little, A.S., Okkotsu, Y., Frisk, A., Cody, W.L., Covey, C.R., and Schurr, M.J. (2015) Expression analysis of the *Pseudomonas aeruginosa* AlgZR two-component regulatory system. *J Bacteriol* **197**: 736-748.
- Pulcrano, G., Iula, D.V., Raia, V., Rossano, F., and Catania, M.R. (2012) Different mutations in mucA gene of *Pseudomonas aeruginosa* mucoid strains in cystic fibrosis patients and their effect on algU gene expression. *New Microbiol* **35**: 295-305.
- Rahme, L.G., Stevens, E.J., Wolfort, S.F., Shao, J., Tompkins, R.G., and Ausubel, F.M. (1995) Common virulence factors for bacterial pathogenicity in plants and animals. *Science* **268**: 1899-1902.
- Takeya, K., and Amako, K. (1966) A rod-shaped *Pseudomonas* phage. *Virology* **28**: 163-165.
- Tseng, B.S., Reichhardt, C., Merrihew, G.E., Araujo-Hernandez, S.A., Harrison, J.J., MacCoss, M.J., and Parsek, M.R. (2018) A Biofilm Matrix-Associated Protease Inhibitor Protects *Pseudomonas aeruginosa* from Proteolytic Attack. *MBio* **9**.
- Tseng, B.S., Zhang, W., Harrison, J.J., Quach, T.P., Song, J.L., Penterman, J., Singh, P.K., Chopp, D.L., Packman, A.I., and Parsek, M.R. (2013) The extracellular matrix protects *Pseudomonas aeruginosa* biofilms by limiting the penetration of tobramycin. *Environ Microbiol* **15**: 2865-2878.
- Turner, K.H., Wessel, A.K., Palmer, G.C., Murray, J.L., and Whiteley, M. (2015) Essential genome of *Pseudomonas aeruginosa* in cystic fibrosis sputum. *Proc Natl Acad Sci U S A* **112**: 4110-4115.

- Vogel, H.J., and Bonner, D.M. (1956) Acetylornithinase of *Escherichia coli*: partial purification and some properties. *J Biol Chem* **218**: 97-106.
- Winsor, G.L., Griffiths, E.J., Lo, R., Dhillon, B.K., Shay, J.A., and Brinkman, F.S. (2016) Enhanced annotations and features for comparing thousands of *Pseudomonas* genomes in the *Pseudomonas* genome database. *Nucleic Acids Res* **44**: D646-653.
- Wolfgang, M.C., Kulasekara, B.R., Liang, X., Boyd, D., Wu, K., Yang, Q., Miyada, C.G., and Lory, S. (2003) Conservation of genome content and virulence determinants among clinical and environmental isolates of *Pseudomonas aeruginosa*. *Proc Natl Acad Sci U S A* **100**: 8484-8489.
- Xu, B., and Wozniak, D.J. (2015) Development of a Novel Method for Analyzing *Pseudomonas aeruginosa* Twitching Motility and Its Application to Define the AmrZ Regulon. *PLoS One* **10**: e0136426.
- Zhao, K., Tseng, B.S., Beckerman, B., Jin, F., Gibiansky, M.L., Harrison, J.J., Luijten, E., Parsek, M.R., and Wong, G.C.L. (2013) Psl trails guide exploration and microcolony formation in *Pseudomonas aeruginosa* biofilms. *Nature* **497**: 388-391.
